# Supplementary material for: Deoxyelephantopin Induces Apoptosis and Enhances Chemosensitivity of Colon Cancer via miR-205/Bcl2 Axis
Source: MDPI journal article supplement (doi:10.3390/ijms23095051), 2022-05-02
Supplement: s1 [file s1]

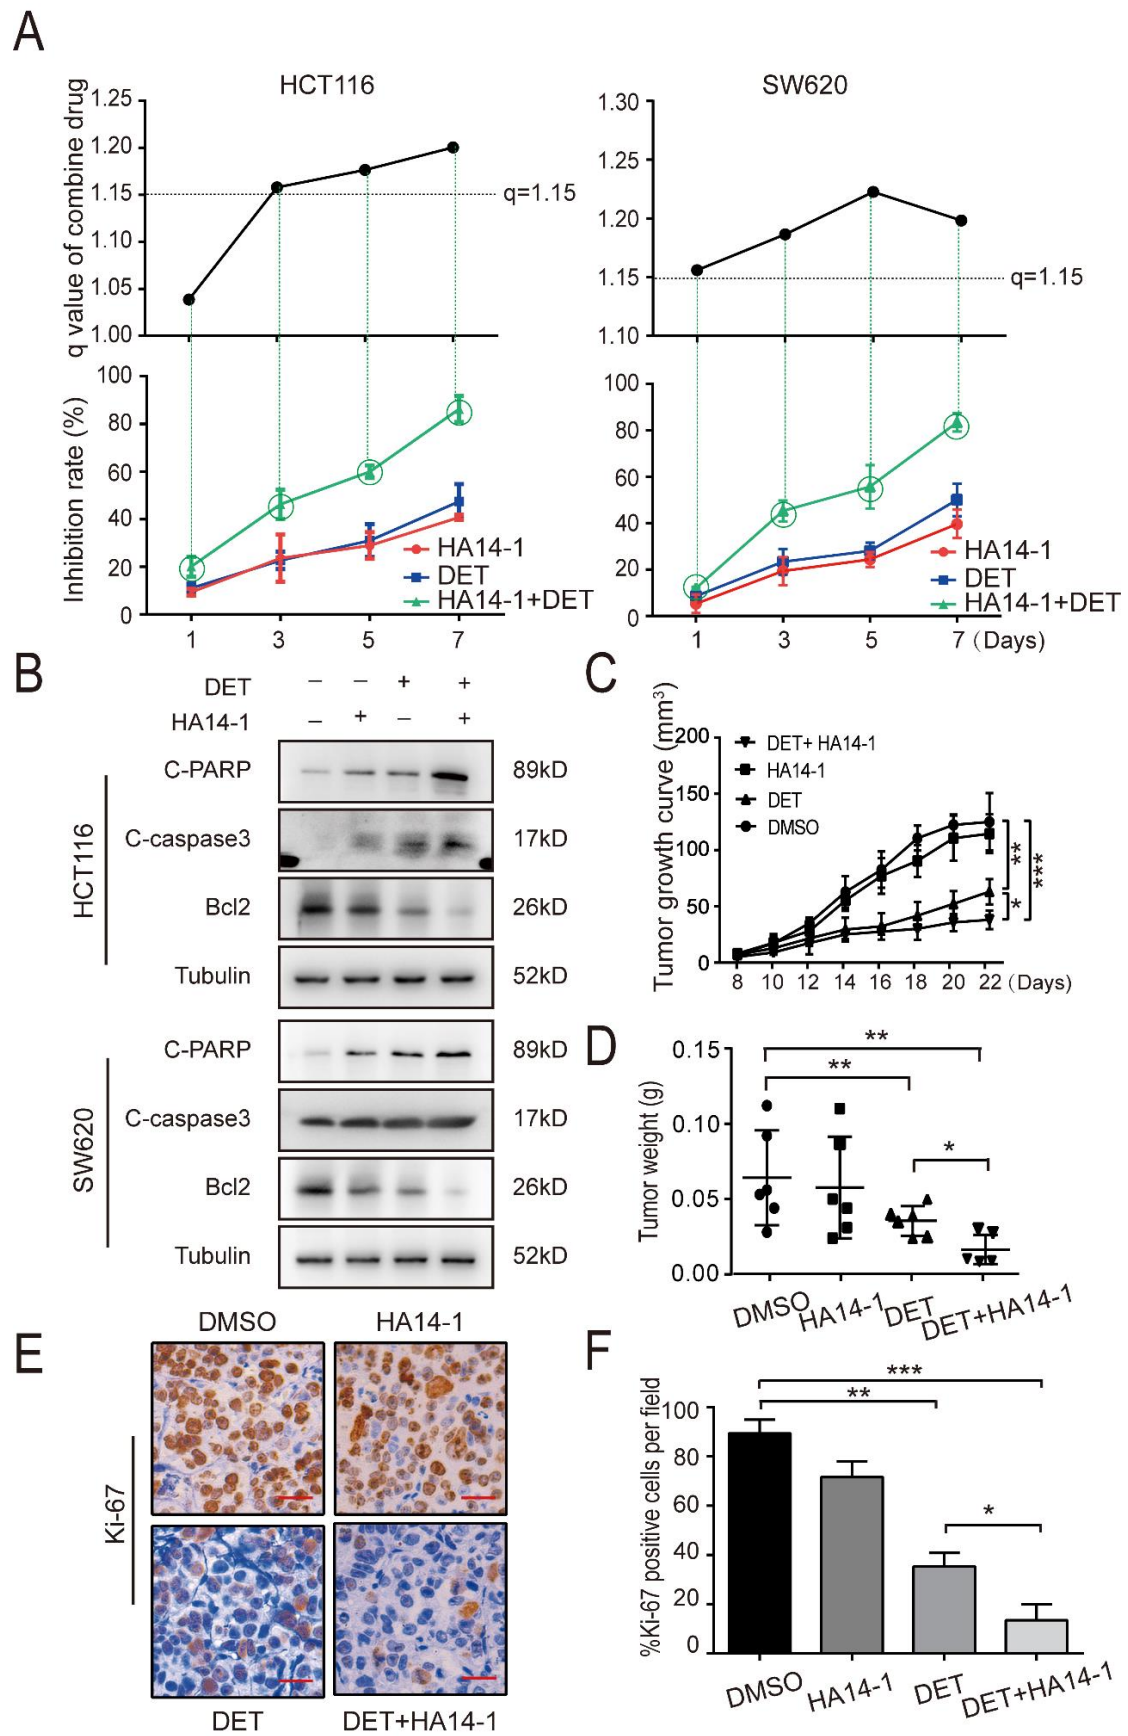

Figure S1. A combination of DET and HA14-1 induces apoptosis and inhibits the growth of colon

### **cancer cells**

(A) HCT116 and SW620 cells were treated with 5  $\mu$ M DET, with or without HA14-1, and then the expression levels of apoptosis proteins were detected using Western Blot assay. (B) Xenograft tumors were removed from immunodeficient mice treated with DET, with or without HA14-1 for two weeks. (C) The volume changes of xenograft tumors treated with DET, with or without HA14-1. (D) Tumors weight of the xenograft tumors in each group. (E and F) The nuclear tumor staining intensity of Ki-67 was evaluated using immunohistochemistry. Scale bar = 20  $\mu$ m. All data were represented as mean  $\pm$ S.D., n = 3, significant difference was evaluated by student's t-test. \*p<0.05, \*\*p<0.01, \*\*\*p<0.001, versus control.
